# Supplementary material for: High denitrification and anaerobic ammonium oxidation contributes to net nitrogen loss in a seagrass ecosystem in the central Red Sea
Source: Copernicus journal article supplement (doi:10.5194/bg-15-7333-2018), 2018-12-11
Supplement: Supplementary file 1 [file bg-15-7333-2018-supplement.zip]

Archive with 3 entries (3 files):
- Table S1.xlsx
- Supplementary material.pdf
- bg-15-7333-2018-supplement-title-page.pdf
