# Supplementary material for: High denitrification and anaerobic ammonium oxidation contributes to net nitrogen loss in a seagrass ecosystem in the central Red Sea
Source: Copernicus journal article supplement (doi:10.5194/bg-15-7333-2018), 2018-12-11
Supplement: Supplementary file 1 [file bg-15-7333-2018-supplement.zip › bg-15-7333-2018-supplement-title-page.pdf]

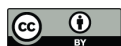

## *Supplement of*

# **High denitrification and anaerobic ammonium oxidation contributes to net nitrogen loss in a seagrass ecosystem in the central Red Sea**

**Neus Garcias-Bonet et al.**

*Correspondence to:* Neus Garcias-Bonet ([neus.garciasbonet@kaust.edu.sa](mailto:neus.garciasbonet@kaust.edu.sa))

- [bg-15-7333-2018-supplement-title-page.pdf](#)
- [Supplementary material.pdf](#)
- [Table S1.xlsx](#)

The copyright of individual parts of the supplement might differ from the CC BY 4.0 License.
