# Supplementary material for: High denitrification and anaerobic ammonium oxidation contributes to net nitrogen loss in a seagrass ecosystem in the central Red Sea
Source: Copernicus journal article supplement (doi:10.5194/bg-15-7333-2018), 2018-12-11
Supplement: Supplementary file 1 [file bg-15-7333-2018-supplement.zip › Supplementary material.pdf]

## Supplementary material

### Supplementary Materials and Methods

The potential denitrification and anammox rates were estimated from the production of  $^{29}\text{N}_2$  and  $^{30}\text{N}_2$  using the equations described elsewhere (Holtappels et al., 2011; Yoshinaga et al., 2011).

Briefly, when N-related substrates (including the  $^{15}\text{N}$ -tracer) were supplied with the combination (1), the net  $\text{N}_2$  production via anammox ( $N_{\text{AMX}}$ ) was calculated from the amount of each  $\text{N}_2$  isotopologue ( $^{28}\text{N}$ ,  $^{29}\text{N}$ , and  $^{30}\text{N}$ ), quantified with GC-MS according to the equation:

$$N_{\text{AMX}} = \left[ ^{29}\text{N} - 2^{28}\text{N}r_{15s}/(1 - r_{15s}) - 2^{30}\text{N}(1 - r_{15n})/r_{15n} \right] / [r_{15s}(1 - r_{15n}) + (1 - r_{15s})r_{15n}]$$

The  $^{15}\text{N}$ -labeling ratio of the  $\text{NO}_2^-$  pool in each vial ( $r_{15n}$ ) was assumed to be the same as the labeling ratio of the reagent added, and the natural abundance of  $^{15}\text{N}$  in atmospheric  $\text{N}_2$  gas ( $r_{15s}$ ), 0.366%. The net  $\text{N}_2$  production via denitrification ( $N_{\text{DEN}}$ ) was determined with the following equation:

$$N_{\text{DEN}} = ^{30}\text{N}/r_{15n}^2$$

When  $^{15}\text{N}$ -labeled ammonium and unlabeled nitrite were added to the incubation vials,  $N_{\text{AMX}}$  was calculated by using the  $^{15}\text{N}$ -labeling ratio of  $\text{NH}_4^+$  pool in each vial ( $r_{15a}$ ).

The measured  $^{29}\text{N}_2$  must be calibrated under the presumption that the unlabeled nitrite reagent contained  $^{15}\text{NO}_2^-$  at the natural abundance of  $^{15}\text{N}$  and the denitrification produced  $^{29}\text{N}_2$  from  $^{15}\text{NO}_2^-$  and  $^{14}\text{NO}_2^-$  of the reagent. This calibration is especially important when the denitrification activity in a sample is much higher than the anammox activity.

$$N_{\text{AMX}} = \left[ ^{29}\text{N} - 2^{28}\text{N}r_{15s}/(1 - r_{15s}) \right] / [r_{15a}(1 - r_{15s}) - r_{15s}(1 - r_{15a})]$$

A detailed explanation about the calculation method for anammox and denitrification rates including the calibration method used here is described in Yoshinaga et al. (2011).

24 **Fig. S1**

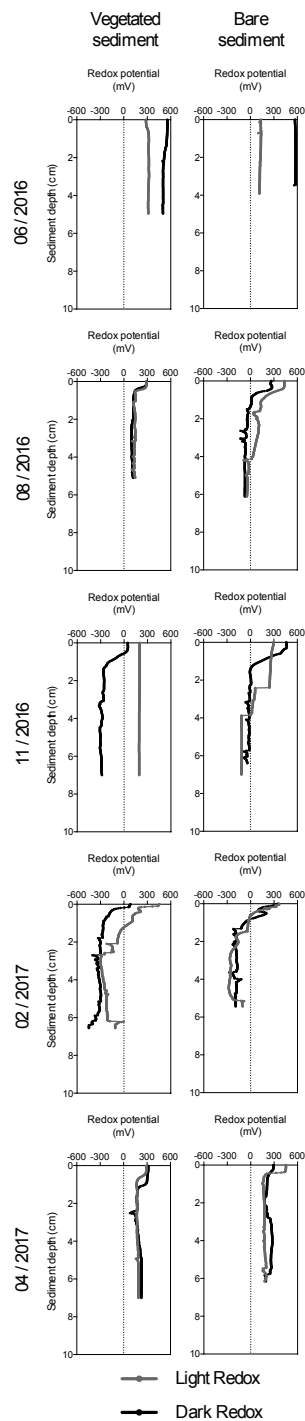

25

26 **Fig. S1.** Sediment redox potential in vegetated and bare sediments during light (gray) and dark

27 (black) incubations along the year.

28 **Fig. S2**

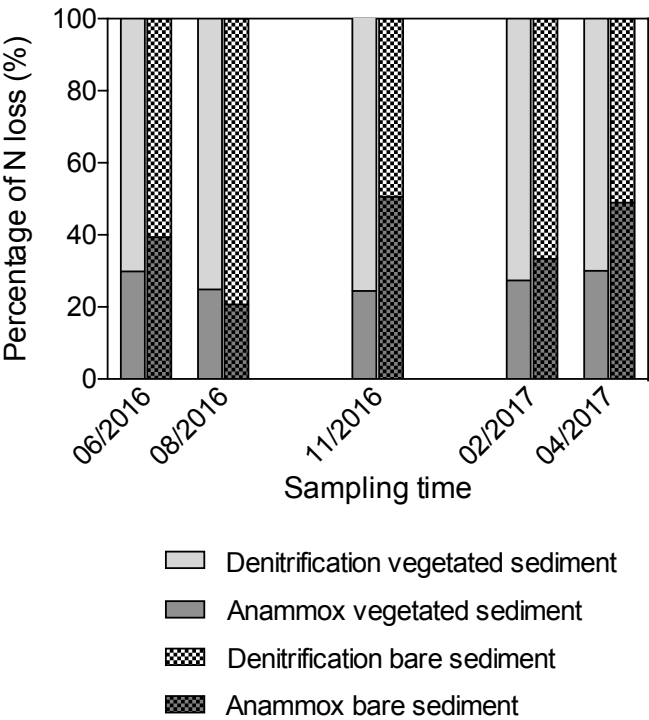

29

30

31

32

**Fig. S2.** Contribution of anammox (dark gray) and denitrification (light gray) to the total N loss on vegetated sediments (solid bars) and bare (square pattern bars) sediments along the year.

## References in Supplementary Material

- Holtappels, M., Lavik, G., Jensen, M. M., and Kuypers, M. M.:  $^{15}\text{N}$ -labeling experiments to dissect the contributions of heterotrophic denitrification and anammox to nitrogen removal in the OMZ waters of the ocean, in: *Methods in enzymology*, Elsevier, 223-251, 2011.
- Yoshinaga, I., Amano, T., Yamagishi, T., Okada, K., Ueda, S., Sako, Y., and Suwa, Y.: Distribution and diversity of anaerobic ammonium oxidation (anammox) bacteria in the sediment of a eutrophic freshwater lake, Lake Kitaura, Japan, *Microbes and environments*, 26, 189-197, 2011.
