# Supplementary material for: High denitrification and anaerobic ammonium oxidation contributes to net nitrogen loss in a seagrass ecosystem in the central Red Sea
Source: Copernicus journal article supplement (doi:10.5194/bg-15-7333-2018), 2018-12-11
Supplement: Supplementary file 1 [file Table S1.xlsx]

## Sheet: Sheet1
Sampling	Date	Temperature (oC)	Sediment type	Sediment horizon (cm)	Replica	Sediment Organic Matter Content (%)	N2 Fixation Rate (nmol N gDW-1 h-1)	Denitrification Rate (nmol N gDW-1 h-1)	Anammox Rate (nmol N gDW-1 h-1)
1	2016-06-01	32.5	Vegetated	horizon 0-1	1	14.2	0.14	3.96	3.78
1	2016-06-01	32.5	Vegetated	horizon 1-2	1	13.55	0.11	19.41	5.38
1	2016-06-01	32.5	Vegetated	horizon 2-3	1	12.35	0.2	13.93	6
1	2016-06-01	32.5	Vegetated	horizon 9-10	1	12.56	0.13
2	2016-08-01	31.9	Vegetated	horizon 0-1	1	14.23		12.17	2.88
2	2016-08-01	31.9	Vegetated	horizon 1-2	1	13.89	0.34	25.38	7.89
2	2016-08-01	31.9	Vegetated	horizon 2-3	1	13.74	0.26	14.83	1.72
2	2016-08-01	31.9	Vegetated	horizon 9-10	1	12.08	0.21
3	2016-11-01	28.4	Vegetated	horizon 0-1	1	15.4	1.43	2.16	1.01
3	2016-11-01	28.4	Vegetated	horizon 1-2	1	15.62	0.97	3.5	0.61
3	2016-11-01	28.4	Vegetated	horizon 2-3	1	16.32	1.61	2.76	0.28
3	2016-11-01	28.4	Vegetated	horizon 9-10	1	12.91	0.49
4	2017-02-01	22.3	Vegetated	horizon 0-1	1	14.29	0.36	3.89	2.78
4	2017-02-01	22.3	Vegetated	horizon 1-2	1	13.3	0.34	5.23	1.32
4	2017-02-01	22.3	Vegetated	horizon 2-3	1	13.26	0.21	6.47	1.75
4	2017-02-01	22.3	Vegetated	horizon 9-10	1	12.42	0.2
5	2017-04-01	29.5	Vegetated	horizon 0-1	1	12.59	0.08	6.88	3.75
5	2017-04-01	29.5	Vegetated	horizon 1-2	1	11.75	0.19	16.89	5.11
5	2017-04-01	29.5	Vegetated	horizon 2-3	1	12.09	0.12	12.62	6.13
5	2017-04-01	29.5	Vegetated	horizon 9-10	1	10.93	0.2
1	2016-06-01	32.5	Bare	horizon 0-1	1	10.17	0.11	5.46	3.41
1	2016-06-01	32.5	Bare	horizon 1-2	1	10.56	0.06	8.44	6.38
1	2016-06-01	32.5	Bare	horizon 2-3	1	9.04	0.05	6.45	5.01
1	2016-06-01	32.5	Bare	horizon 9-10	1	9.04	0.02
2	2016-08-01	31.9	Bare	horizon 0-1	1	9.09	0.13	5.61	2
2	2016-08-01	31.9	Bare	horizon 1-2	1	8.48	0.06	19.67	3
2	2016-08-01	31.9	Bare	horizon 2-3	1	8.68	0.08	6.15	1.49
2	2016-08-01	31.9	Bare	horizon 9-10	1	7.89	0.02
3	2016-11-01	28.4	Bare	horizon 0-1	1	8.18	0.19	1.5	1.06
3	2016-11-01	28.4	Bare	horizon 1-2	1	8.98	0.18	1.24	1.8
3	2016-11-01	28.4	Bare	horizon 2-3	1	8.51	0.17	1.14	1.45
3	2016-11-01	28.4	Bare	horizon 9-10	1	7.8	0.04
4	2017-02-01	22.3	Bare	horizon 0-1	1	10.27	0.12	4.94	1.67
4	2017-02-01	22.3	Bare	horizon 1-2	1	8.9	0.12	6.02	2.62
4	2017-02-01	22.3	Bare	horizon 2-3	1	9.97	0.17	4.11	3.46
4	2017-02-01	22.3	Bare	horizon 9-10	1	9.19	0.05
5	2017-04-01	29.5	Bare	horizon 0-1	1	8.24	0.06	3.23	2.61
5	2017-04-01	29.5	Bare	horizon 1-2	1	7.49	0.05	7.08	5.71
5	2017-04-01	29.5	Bare	horizon 2-3	1	7.3	0.04	6.95	6.55
5	2017-04-01	29.5	Bare	horizon 9-10	1	7.1	0.01
1	2016-06-01	32.5	Vegetated	horizon 0-1	2	13.89	0.17	4.17	3.11
1	2016-06-01	32.5	Vegetated	horizon 1-2	2	13.89	0.14	20.77	4.98
1	2016-06-01	32.5	Vegetated	horizon 2-3	2	14.5	0.19	15.09	4.27
1	2016-06-01	32.5	Vegetated	horizon 9-10	2	13.66	0.17
2	2016-08-01	31.9	Vegetated	horizon 0-1	2	14.23	0.23	7.69	4.75
2	2016-08-01	31.9	Vegetated	horizon 1-2	2	13.89	0.46	21.93	6.06
2	2016-08-01	31.9	Vegetated	horizon 2-3	2	13.75	0.37	14.07	2.12
2	2016-08-01	31.9	Vegetated	horizon 9-10	2	12.08	0.25
3	2016-11-01	28.4	Vegetated	horizon 0-1	2	16.05	1.2	2.09	1.34
3	2016-11-01	28.4	Vegetated	horizon 1-2	2	16.22	0.98	3.45	1.22
3	2016-11-01	28.4	Vegetated	horizon 2-3	2	15.99	0.96	2.93	0.93
3	2016-11-01	28.4	Vegetated	horizon 9-10	2	13.51	0.61
4	2017-02-01	22.3	Vegetated	horizon 0-1	2	14.12	0.23	3.93	2.42
4	2017-02-01	22.3	Vegetated	horizon 1-2	2	13.2	0.26	5.13	2.17
4	2017-02-01	22.3	Vegetated	horizon 2-3	2	12.78	0.26	7.77	1.02
4	2017-02-01	22.3	Vegetated	horizon 9-10	2	11.84	0.2
5	2017-04-01	29.5	Vegetated	horizon 0-1	2	13.5	0.29	5.5	3.19
5	2017-04-01	29.5	Vegetated	horizon 1-2	2	13.33	0.17	14.55	5.2
5	2017-04-01	29.5	Vegetated	horizon 2-3	2	12.66	0.13	11.56	4.59
5	2017-04-01	29.5	Vegetated	horizon 9-10	2	12.08	0.06
1	2016-06-01	32.5	Vegetated	horizon 0-1	3	13.33	0.18	4.85	2.43
1	2016-06-01	32.5	Vegetated	horizon 1-2	3	14.06	0.17	21.37	5.77
1	2016-06-01	32.5	Vegetated	horizon 2-3	3	14.1	0.25	12.87	5.13
1	2016-06-01	32.5	Vegetated	horizon 9-10	3	11.79	0.11
2	2016-08-01	31.9	Vegetated	horizon 0-1	3	14.23	0.63	3.96	4.34
2	2016-08-01	31.9	Vegetated	horizon 1-2	3	13.89	0.48	19.72	6.7
2	2016-08-01	31.9	Vegetated	horizon 2-3	3	13.75	0.35	13.37	3.93
2	2016-08-01	31.9	Vegetated	horizon 9-10	3	12.08
3	2016-11-01	28.4	Vegetated	horizon 0-1	3	15.72	1.13	2.47	1.29
3	2016-11-01	28.4	Vegetated	horizon 1-2	3	15.03	1.52	3.59	1.49
3	2016-11-01	28.4	Vegetated	horizon 2-3	3	15.52	1.19	3.54	0.32
3	2016-11-01	28.4	Vegetated	horizon 9-10	3	12.26	0.72
4	2017-02-01	22.3	Vegetated	horizon 0-1	3	14.45	0.3	3.28	2.07
4	2017-02-01	22.3	Vegetated	horizon 1-2	3	13.31	0.25	5.43	3.14
4	2017-02-01	22.3	Vegetated	horizon 2-3	3	13.56	0.22	6.42	0.29
4	2017-02-01	22.3	Vegetated	horizon 9-10	3	10.98	0.23
5	2017-04-01	29.5	Vegetated	horizon 0-1	3	13.28	0.2	5.5	2.41
5	2017-04-01	29.5	Vegetated	horizon 1-2	3	12.81	0.19	16.46	5.83
5	2017-04-01	29.5	Vegetated	horizon 2-3	3	12.66	0.14	10.68	4.67
5	2017-04-01	29.5	Vegetated	horizon 9-10	3	11.4	0.05
1	2016-06-01	32.5	Bare	horizon 0-1	2	10.64	0.14	6.66	3.11
1	2016-06-01	32.5	Bare	horizon 1-2	2	9.59	0.06	9.26	6.68
1	2016-06-01	32.5	Bare	horizon 2-3	2	9.6	0.04	7.92	5.96
1	2016-06-01	32.5	Bare	horizon 9-10	2	8.69	0.01
2	2016-08-01	31.9	Bare	horizon 0-1	2	9.09	0.12	5.44	1.91
2	2016-08-01	31.9	Bare	horizon 1-2	2	8.48	0.04	9.22	4
2	2016-08-01	31.9	Bare	horizon 2-3	2	8.68	0.05	12.93	0.56
2	2016-08-01	31.9	Bare	horizon 9-10	2	7.89	0.02
3	2016-11-01	28.4	Bare	horizon 0-1	2	9.02	0.21	1.34	1.24
3	2016-11-01	28.4	Bare	horizon 1-2	2	8.87	0.18	1.31	1.76
3	2016-11-01	28.4	Bare	horizon 2-3	2	9.61	0.22	1.42	1.4
3	2016-11-01	28.4	Bare	horizon 9-10	2	8.58	0.02
4	2017-02-01	22.3	Bare	horizon 0-1	2	8.38	0.12	2.94	0.87
4	2017-02-01	22.3	Bare	horizon 1-2	2	7.68	0.14	3.76	2.88
4	2017-02-01	22.3	Bare	horizon 2-3	2	8.32	0.16	3.3	3.65
4	2017-02-01	22.3	Bare	horizon 9-10	2	7.65	0.03
5	2017-04-01	29.5	Bare	horizon 0-1	2	8.88	0.05	2.78	2.93
5	2017-04-01	29.5	Bare	horizon 1-2	2	7.53	0.04	7.02	6.93
5	2017-04-01	29.5	Bare	horizon 2-3	2	7.64	0.03	6.25	7.67
5	2017-04-01	29.5	Bare	horizon 9-10	2	7.09	0.01
1	2016-06-01	32.5	Bare	horizon 0-1	3	9.4	0.11	6.33	3.05
1	2016-06-01	32.5	Bare	horizon 1-2	3	9.2	0.06	9.26	6.68
1	2016-06-01	32.5	Bare	horizon 2-3	3	9.65	0.07	7.84	4.92
1	2016-06-01	32.5	Bare	horizon 9-10	3	7.96	0.03
2	2016-08-01	31.9	Bare	horizon 0-1	3	9.09	0.13	4.02	2
2	2016-08-01	31.9	Bare	horizon 1-2	3	8.48	0.08	5.61	4
2	2016-08-01	31.9	Bare	horizon 2-3	3	8.68	0.05	12.32	1.39
2	2016-08-01	31.9	Bare	horizon 9-10	3	7.89	0.03
3	2016-11-01	28.4	Bare	horizon 0-1	3	7.99	0.28	2.41	1.05
3	2016-11-01	28.4	Bare	horizon 1-2	3	9.08	0.33	1.42	1.73
3	2016-11-01	28.4	Bare	horizon 2-3	3	9.15	0.29	1.12	1.77
3	2016-11-01	28.4	Bare	horizon 9-10	3	7.44	0.06
4	2017-02-01	22.3	Bare	horizon 0-1	3	7.67	0.12	6.24	1.16
4	2017-02-01	22.3	Bare	horizon 1-2	3	6.9	0.06	6.93	2.75
4	2017-02-01	22.3	Bare	horizon 2-3	3	8.62	0.16	3.54	2.4
4	2017-02-01	22.3	Bare	horizon 9-10	3	8.23	0.12
5	2017-04-01	29.5	Bare	horizon 0-1	3	10.21	0	3.25	3.16
5	2017-04-01	29.5	Bare	horizon 1-2	3	6.93	0.04	7.91	8
5	2017-04-01	29.5	Bare	horizon 2-3	3	6.74	0.05	7.65	6.46
5	2017-04-01	29.5	Bare	horizon 9-10	3	5.91	0.01
